# Supplementary material for: Enhanced fluorescent effect of graphitic C3N4@ZIF-8 nanocomposite contribute to its improved sensing capabilities
Source: Royal Society of Chemistry journal article supplement (doi:10.1039/c8ra10330e), 2019-01-01
Supplement: c8ra10330e1.pdf [file c8ra10330e1.pdf]

## Enhanced fluorescent effect of graphitic $C_3N_4@ZIF-8$ nanocomposite contribute to its improved sensing capabilities

Wei Chen, Shu Kong, Jian Wang, Liping Du, Wen Cai and Chunsheng Wu\*

Institute of Medical Engineering, Department of Biophysics, School of Basic Medical Sciences,  
Health Science Center, Xi'an Jiaotong University, Xi'an 710061, China

Email: wuchunsheng@xjtu.edu.cn; Fax: +86-29-82657763; Tel: +86-29-82657763

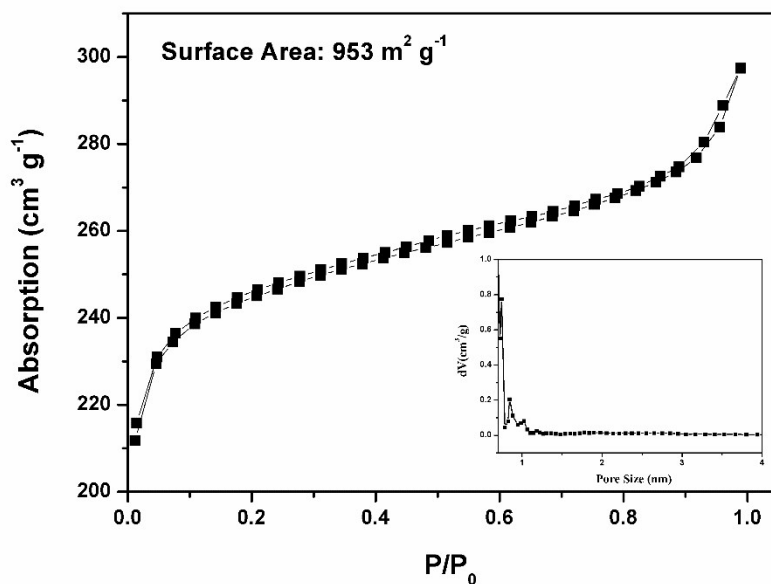

Fig.S1  $N_2$  adsorption and desorption isotherms of the  $g-C_3N_4@ZIF-8$ . Insert: corresponding pore-size distributions based on NLDFT method.
